# Supplementary material
Source: Elsevier journal article supplement (https://www.sciencedirect.com/science/article/pii/S1885585720301262)
Supplement: mmc1 [file S1885585720301262:mmc1.pdf]

SUPPLEMENTARY DATA

Table 1 of the supplementary data

Score for the definition of study quality

| Study criteria | Definition                                |
|----------------|-------------------------------------------|
| 1.             | Statement of objectives                   |
| 2.             | Explicit inclusion and exclusion criteria |
| 3.             | Description of intervention               |
| 4.             | Objective means of follow-up              |
| 5.             | Description of adverse events             |
| 6.             | Power analysis                            |
| 7.             | Description of statistical methods        |
| 8.             | Multicenter design                        |
| 9.             | Discussion of withdrawals                 |
| 10.            | Details on medical therapy                |
